# Supplementary material for: Selection of tRNA Genes in Human Breast Tumours Varies Substantially between Individuals
Source: MDPI journal article supplement (doi:10.3390/cancers15143576), 2023-07-12
Supplement: s1 [file s1]

## Supplementary figures

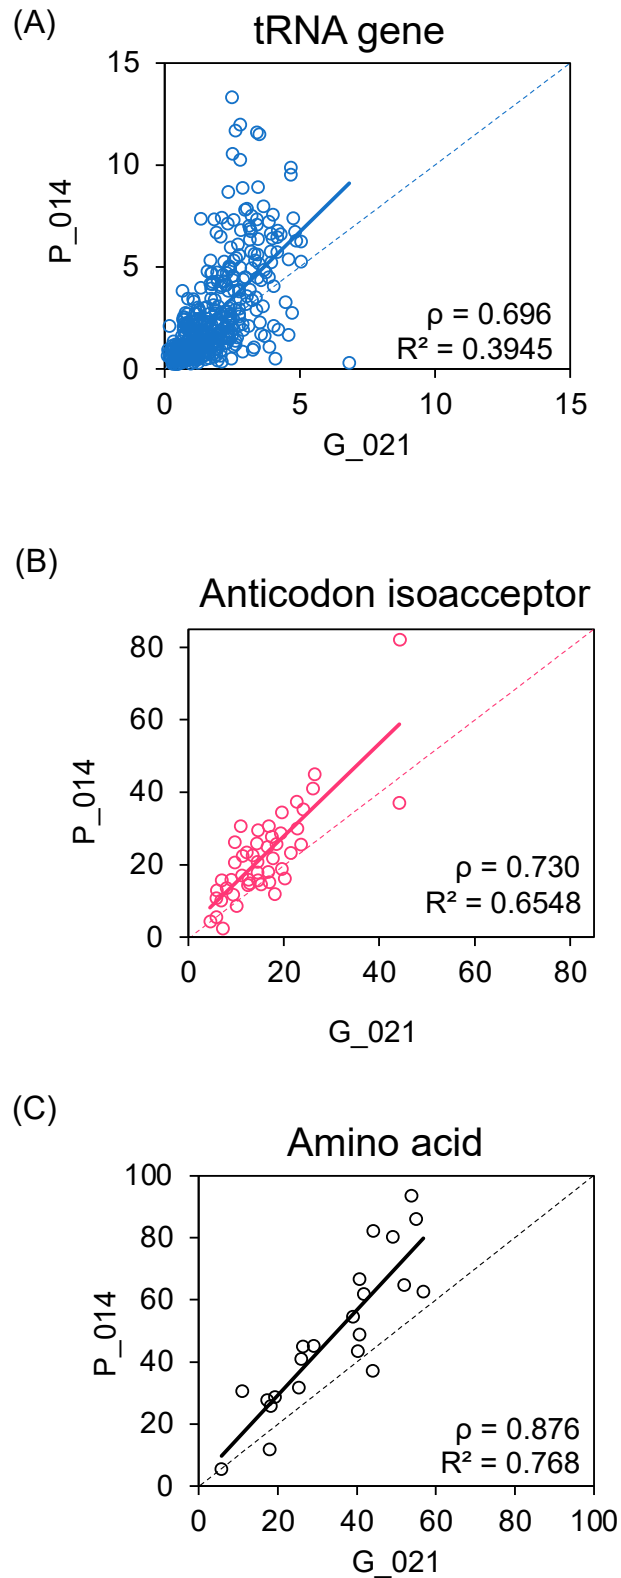

**Supplementary Figure S1.** Variation between cancers P<sub>014</sub> and G<sub>021</sub> of H3K27ac enrichment at tRNA genes and families. **(A-C)** Plots comparing H3K27ac Q-values at 428 tRNA gene loci **(A)**, 48 anticodon isoacceptor families **(B)**, and 21 amino acid isotype families **(C)** in primary tumours P<sub>014</sub> and G<sub>021</sub>, which had overall relative H3K27ac enrichment across the 40 tumours and 428 tRNA genes of 1076 and 754, respectively. Spearman's rank correlation coefficient is shown ( $\rho$ ).

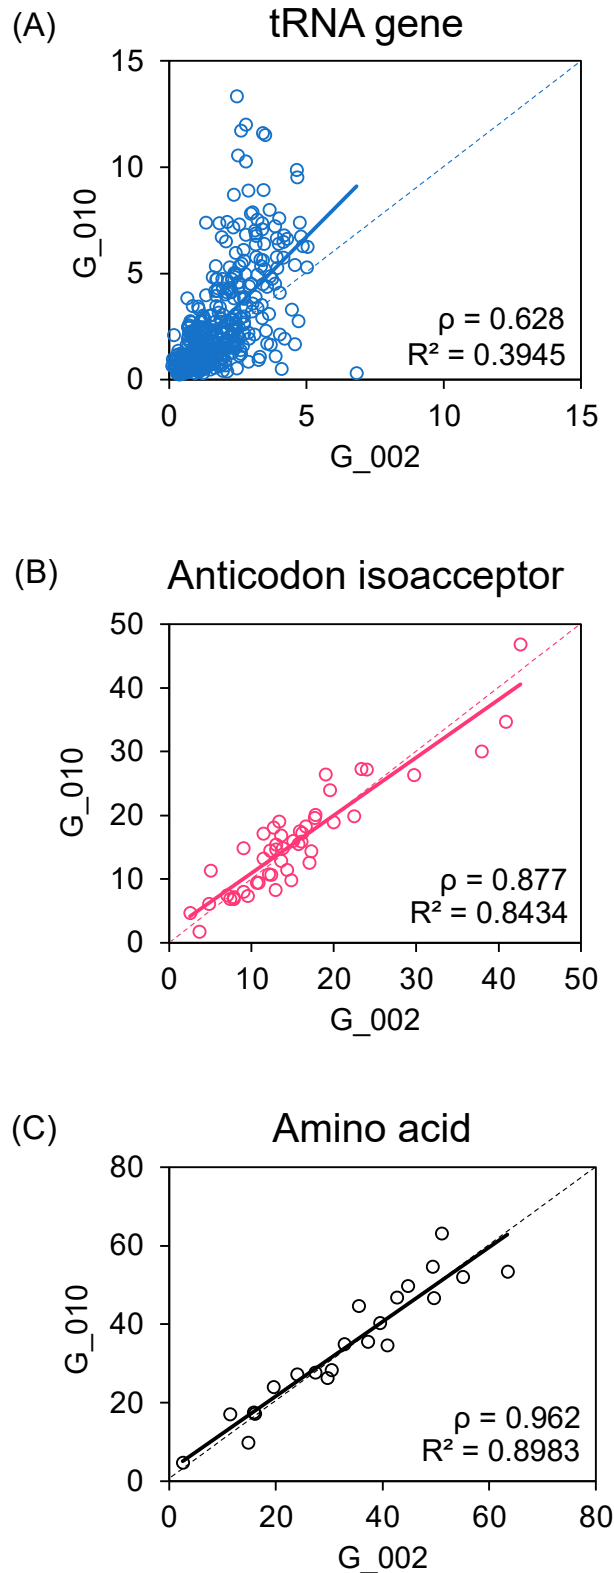

**Supplementary Figure S2.** Variation between cancers G\_002 and G\_010 of H3K27ac enrichment at tRNA genes and families. **(A-C)** Plots comparing H3K27ac Q-values at 428 tRNA gene loci **(A)**, 48 anticodon isoacceptor families **(B)**, and 21 amino acid isotype families **(C)** in primary tumours G\_010 and G\_002, which were chosen because they share very similar overall H3K27ac enrichment across the 40 tumours and 428 tRNA genes (756 and 619, respectively). Spearman's rank correlation coefficient is shown ( $\rho$ ).

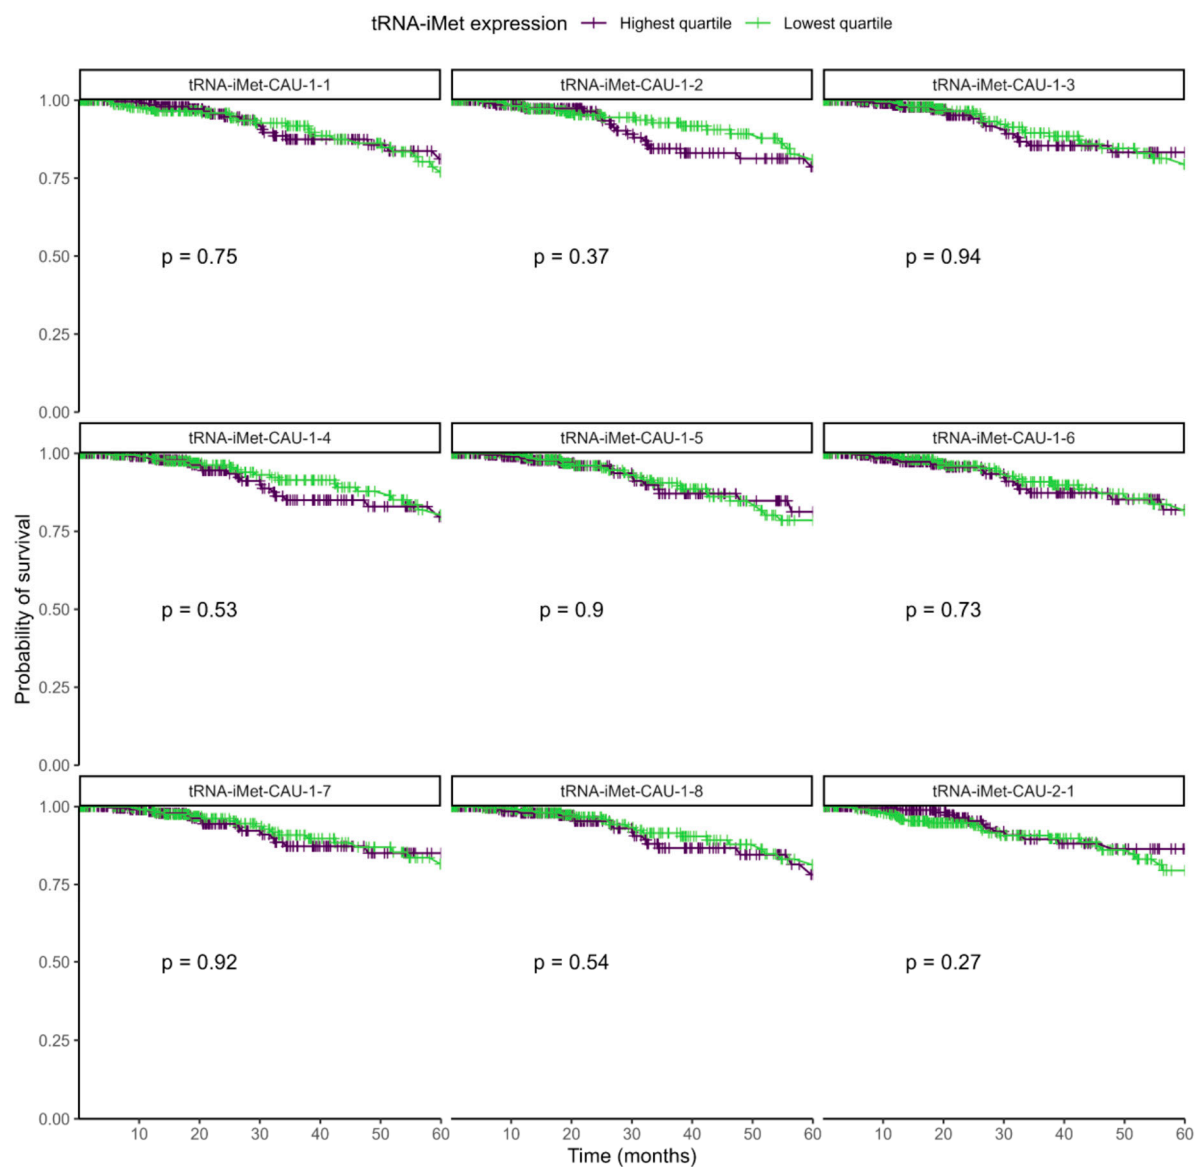

**Supplementary Figure S3.** Survival of patients with breast invasive carcinomas expressing upper quartile (purple) or lower quartile (green) levels of each individual tRNA-iMet-CAU.
